# Supplementary material
Source: PubMed Central journal article supplement (PMC5863920)

### Supplemental Material

**Supplemental Figure 1.** The distribution of total Autism Quotient (AQ) total scores plotted as a function of participant sex. Higher scores indicate more autism-like traits. Participants were selectively recruited into the study based on their AQ total scores. The distributions of the High and Low AQ groups did not overlap. The distributions of scores for male and female participants within each group were indistinguishable (i.e., similar means and variance).

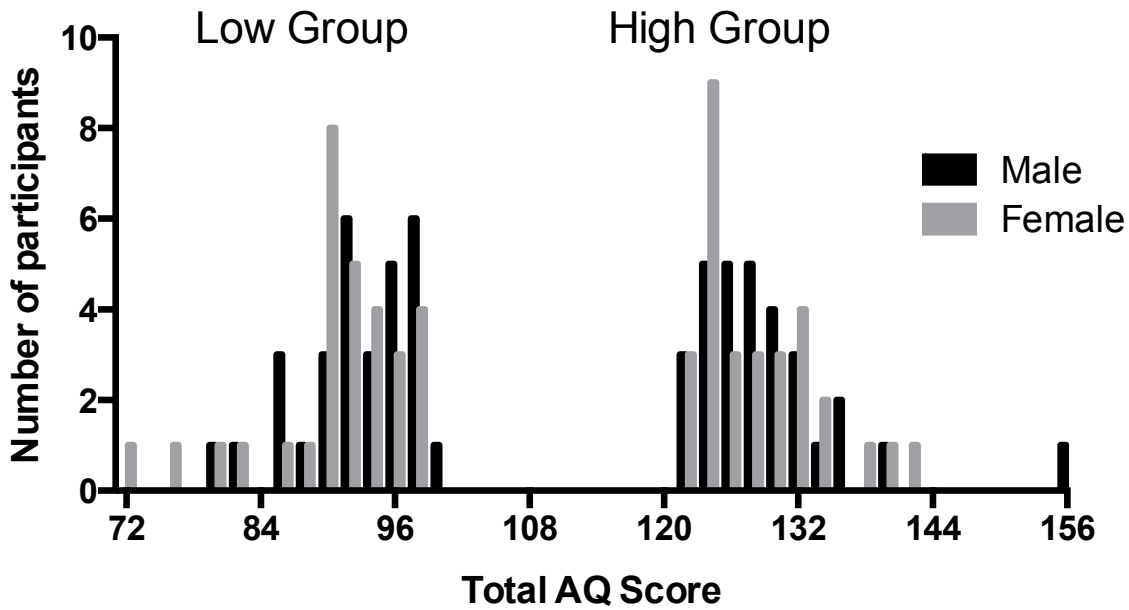

### Supplemental Material

**Supplemental Figure 2.** Example eye gaze following stimuli. The top images represent those that were presented to participants during the eye gaze following task. These static color pictures consisted of naturalistic scenes involving an actor looking at one of many possible objects. The bottom images are coded for the corresponding object-label associations that were represented in the four multiple choice answers from which participants had to identify the target gazed-at object. These included the a target gazed-at object (TO) shown in green, a plausible non-target object (PO) shown in yellow, and two implausible objects (IO) shown in red.

#### Images as presented to participants

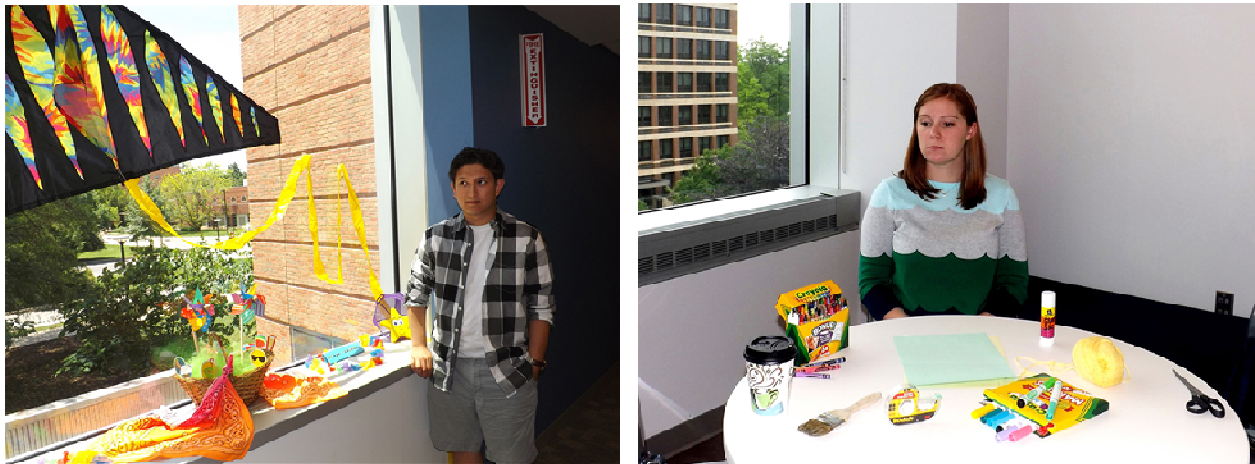

#### Images coded for object types

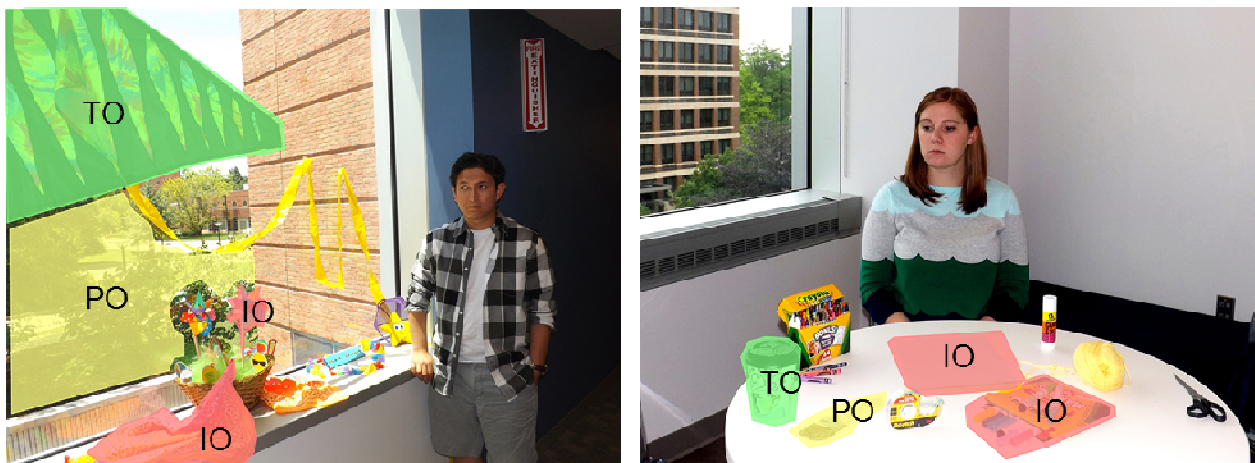

Supplement: NIHMS910925-supplement-supplement_1.pdf [file NIHMS910925-supplement-supplement_1.pdf]
